# Supplementary material for: Electrical and thermal transport properties of spark plasma sintered n-type Bi2Te3−xSex alloys: the combined effect of point defect and Se content
Source: Royal Society of Chemistry journal article supplement (doi:10.1039/c5tc02219c), 2015-01-01
Supplement: c5tc02219c1.pdf [file c5tc02219c1.pdf]

## Supporting Information

### **Electrical and thermal transport properties of spark plasma sintered *n*-type**

### **Bi<sub>2</sub>Te<sub>3-x</sub>Se<sub>x</sub> alloys: combined effect of point defect and Se content**

Yu Pan, Tian-Ran Wei, Chao-Feng Wu and Jing-Feng Li\*

*State Key Laboratory of New Ceramics and Fine Processing,  
School of Materials Science and Engineering, Tsinghua University,  
Beijing 100084, China.*

*E-mail: [jingfeng@mail.tsinghua.edu.cn](mailto:jingfeng@mail.tsinghua.edu.cn);*

*Fax: +86-62771160;*

*Tel: +86-10-62784845.*

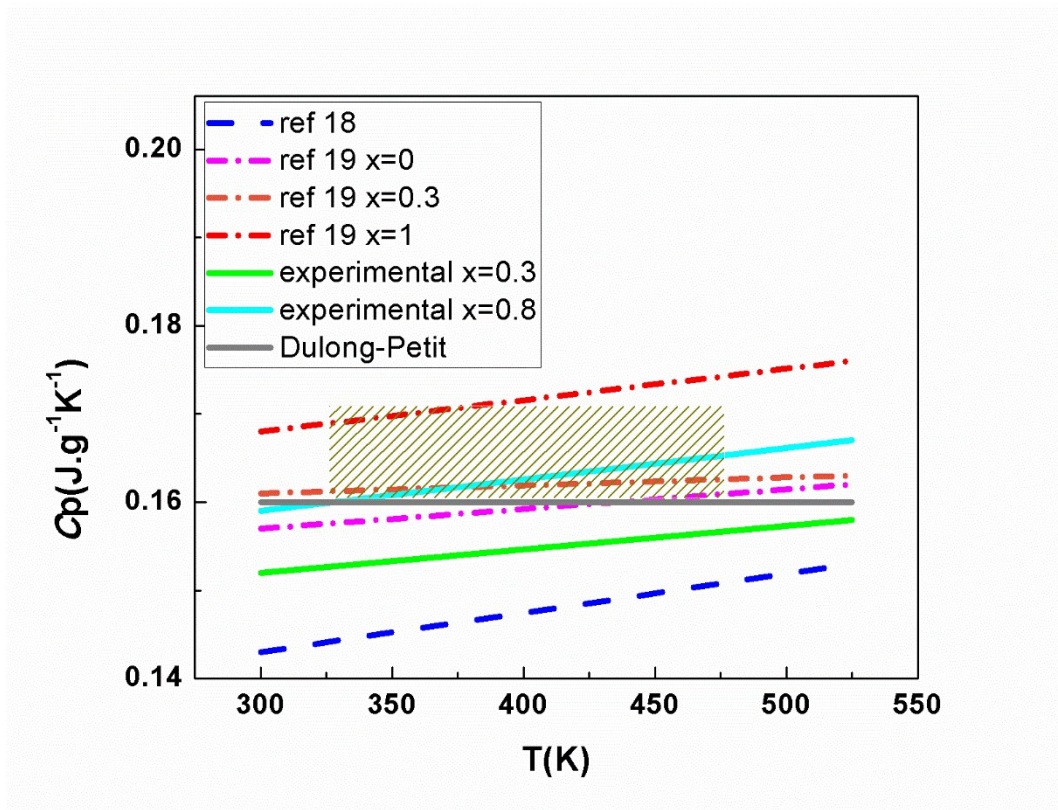

**Fig. S1** Specific heat of the  $\text{Bi}_2\text{Te}_{2-x}\text{Se}_x$  samples. The shadow parts are the adopted values and other lines are reference values for comparison.

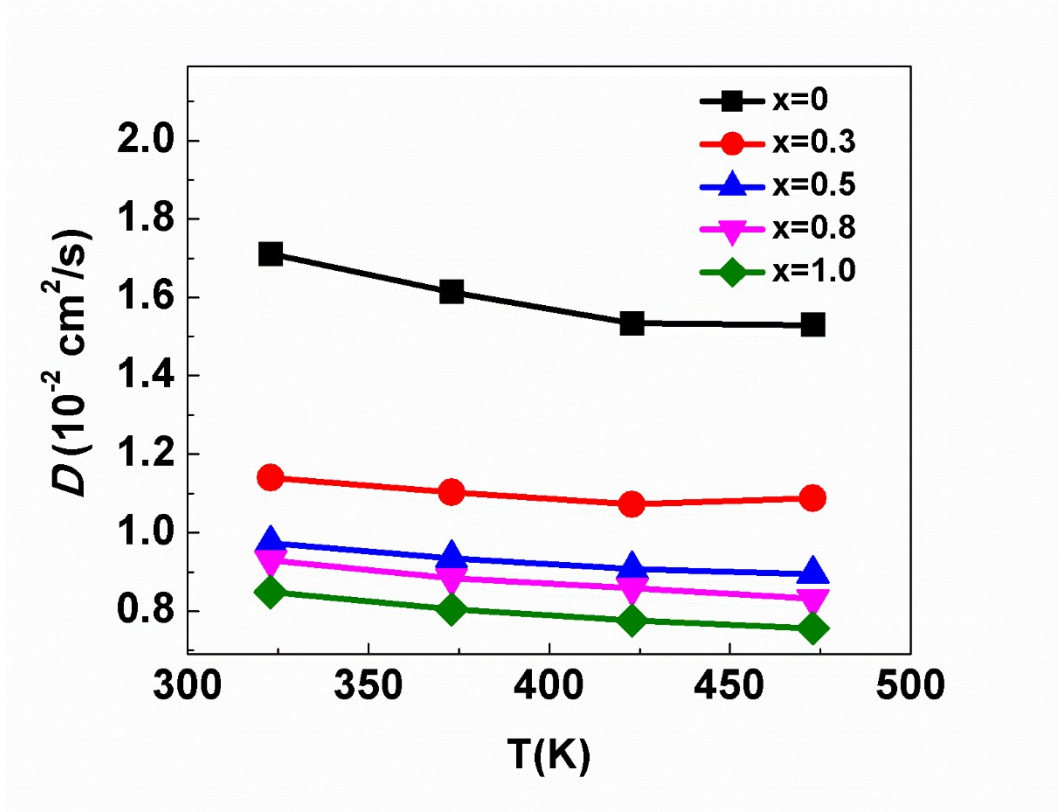

**Fig. S2** Thermal diffusivity coefficient of the samples  $\text{Bi}_2\text{Te}_{3-x}\text{Se}_x$  ( $x=0, 0.3, 0.5, 0.8$  and  $1$ ).

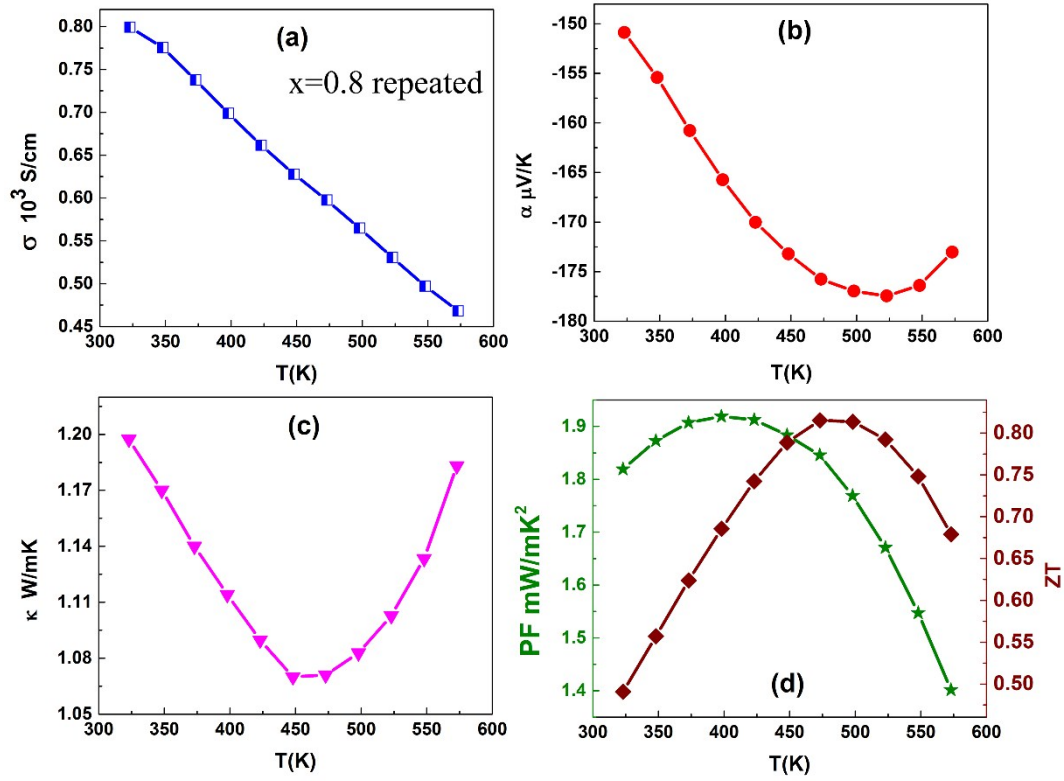

**Fig. S3** Temperature dependence of electrical and thermal transport properties of the re-prepared sample  $\text{Bi}_2\text{Te}_{2.2}\text{Se}_{0.8}$  (named  $x=0.8$  repeated in the manuscript) from 323K to 573K. This high temperature measurement up to 573K proves that the maximum  $ZT$  value is limited at 473K. In addition, the uptrend of the thermal conductivity at  $\sim 473\text{K}$  demonstrates the onset temperature of the bipolar effect.

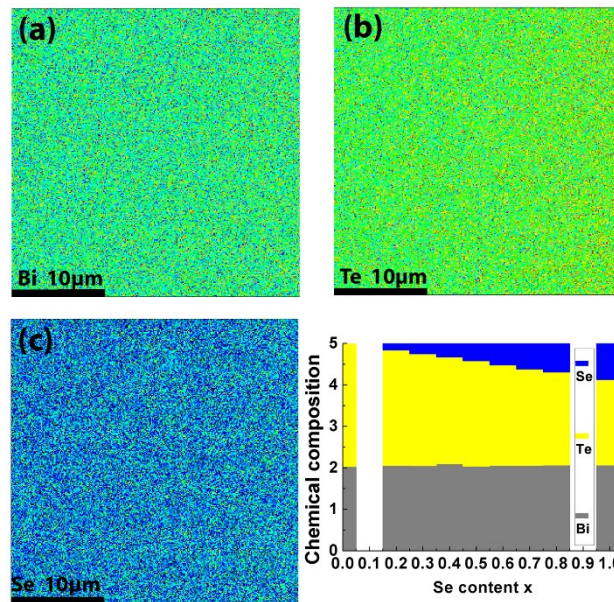

**Fig. S4** EPMA mapping of main elements on polished  $\text{Bi}_2\text{Te}_{2.2}\text{Se}_{0.8}$  surface (a) Bi, (b) Te, (c) Se and quantitative analysis results.

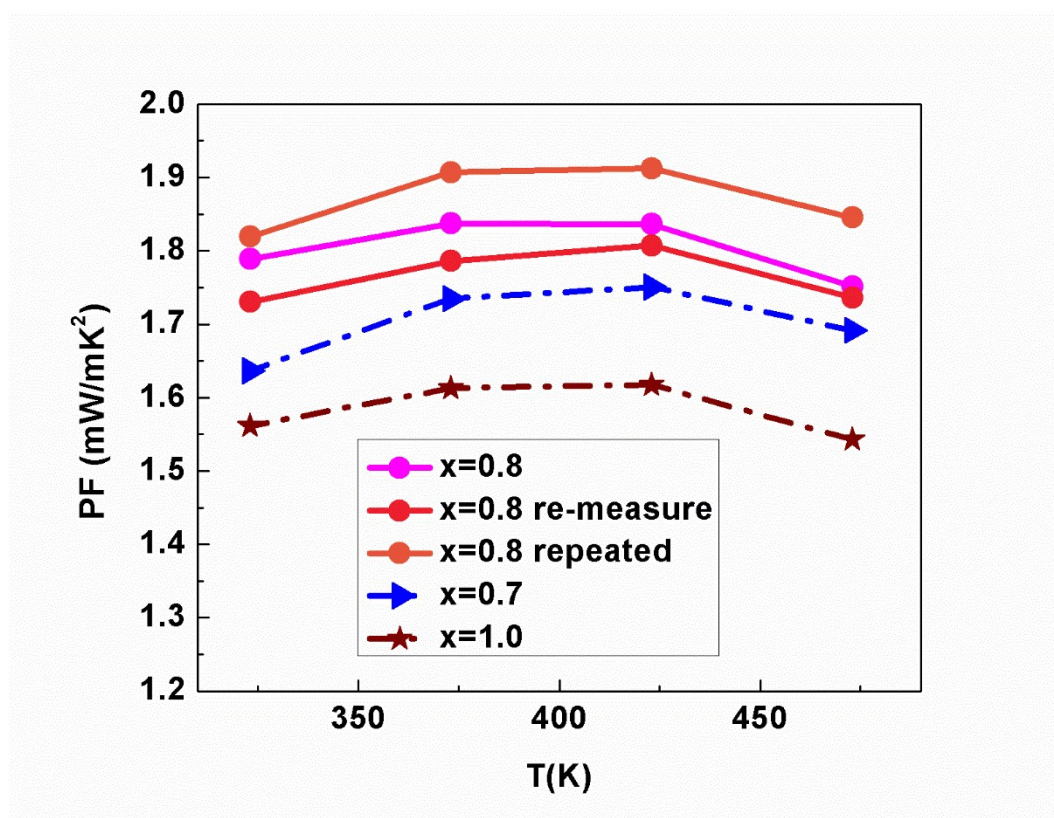

**Fig. S5** Comparison of the power factors of  $\text{Bi}_2\text{Te}_{2.2}\text{Se}_{0.8}$  to adjacent composition  $\text{Bi}_2\text{Te}_{2.3}\text{Se}_{0.7}$  and  $\text{Bi}_2\text{Te}_2\text{Se}_1$ .

| Se contents x                                                              | 0           | 0.2         | 0.3         | 0.4         |
|----------------------------------------------------------------------------|-------------|-------------|-------------|-------------|
| <b>Lorenz number L<br/>(<math>10^{-8} \text{ V}^2\text{K}^{-2}</math>)</b> | <b>1.77</b> | <b>1.72</b> | <b>1.71</b> | <b>1.69</b> |
|                                                                            | 0.5         | 0.6         | 0.7         | 0.8         |
|                                                                            | 1.85        | 1.69        | 1.68        | 1.66        |
|                                                                            |             |             |             | 1.63        |

**Fig. S6** Calculated Lorenz number



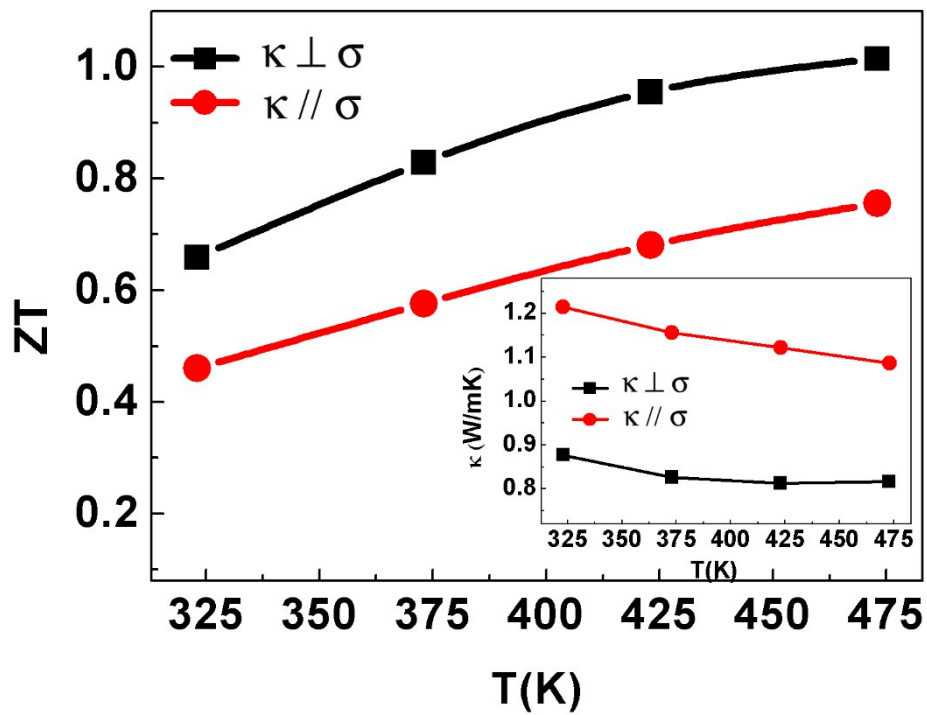

**Fig. S7** Comparison of the  $ZT$  of  $\text{Bi}_2\text{Te}_{2.2}\text{Se}_{0.8}$  with thermal conductivity measured perpendicular and parallel to the measuring direction of electrical conductivity.
